# Supplementary material
Source: publisher figshare collection journal article supplement (https://acs.figshare.com/ndownloader/files/4211659)
Supplement: Supplementary file 1 [file 4211659]

## *Supporting Information*

### **Fused Silver Nanowires with Metal Oxide Nanoparticles and Organic Polymers for Highly Transparent Conductors**

Rui Zhu,<sup>†</sup> Choong-Heui Chung,<sup>†</sup> Kitty Cha,<sup>†</sup> Wenbing Yang,<sup>†</sup> Yue Bing Zheng,<sup>‡,§</sup>  
Huanping Zhou,<sup>†</sup> Tze-Bin Song,<sup>†</sup> Chun-Chao Chen,<sup>†</sup> Paul S. Weiss,<sup>†,‡,§</sup> Gang Li,<sup>†</sup> and  
Yang Yang,<sup>†,‡,\*</sup>

<sup>†</sup>Materials Science & Engineering, <sup>‡</sup>California NanoSystems Institute and <sup>§</sup>Departments  
of Chemistry & Biochemistry, University of California, Los Angeles, Los Angeles,  
California 90095, United States

\* Corresponding Author: yangy@ucla.edu

This file includes:

**Table ST1.** Comparison between high-temperature annealing treatment and TiO<sub>2</sub> sol-gel solution treatment.

**Figure S1.** (A) Optical transmittance spectra of AgNW-TiO<sub>2</sub> films with different sheet resistances. (B) Plot of sheet resistance *versus* film transmittance at 550 nm for AgNW-TiO<sub>2</sub> films.

**Figure S2.** Scanning electron micrographs of a pristine AgNW film without treatment. (A) Top view of crossed AgNWs. The arrow indicates the intersection point of two crossed AgNWs. (B) Cross-sectional SEM image of the intersection point indicated by an arrow in (A). (C) Enlarged cross-sectional SEM image.

**Table ST1.** Comparison between high-temperature annealing treatment and TiO<sub>2</sub> sol-gel solution treatment. The solution treatment can achieve resistance reduction similar to the high-temperature annealing method.

| <b>Sheet Resistance before treatment</b> | <b>Treatment method</b>                     | <b>Sheet resistance after treatment</b> |
|------------------------------------------|---------------------------------------------|-----------------------------------------|
| >1 MΩ/sq                                 | 200 °C annealing for 15 min                 | ~30 Ω/sq                                |
| >1 MΩ/sq                                 | TiO <sub>2</sub> sol-gel solution treatment | ~20 Ω/sq                                |

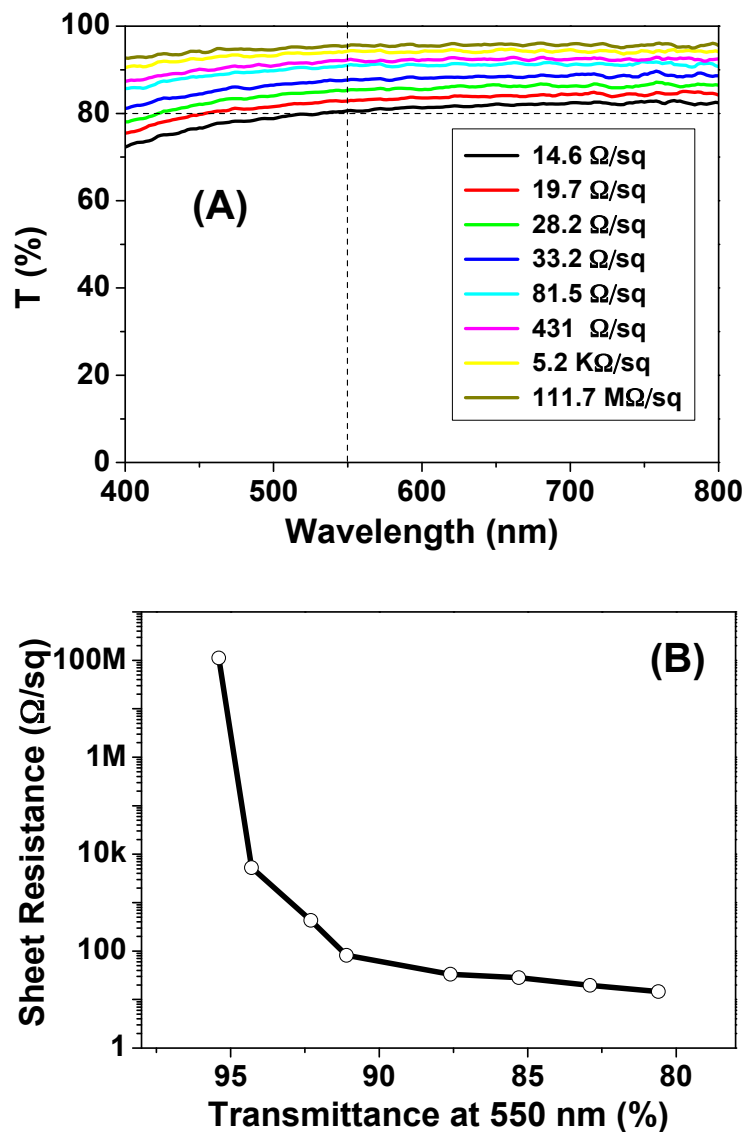

**Figure S1.** (A) Optical transmittance spectra of AgNW-TiO<sub>2</sub> films with different sheet resistances. (B) Plot of sheet resistance *versus* film transmittance at 550 nm for AgNW-TiO<sub>2</sub> films. Sheet resistances were measured using 4-point probe method.

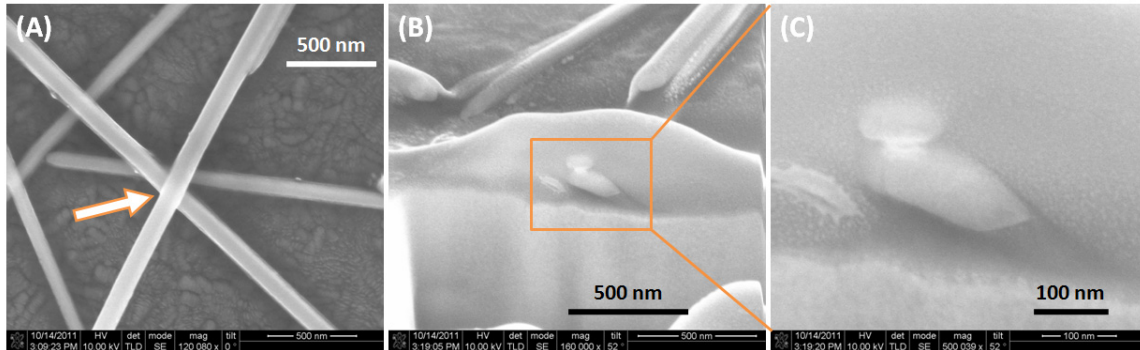

**Figure S2.** Scanning electron micrographs of a pristine AgNW film without treatment. (A) Top view of crossed AgNWs. The arrow indicates the intersection point of two crossed AgNWs. (B) Cross-sectional SEM image of the AgNW intersection point indicated by an arrow in (A). (C) Enlarged cross-sectional SEM image. The cross-sectional image is obtained through focused ion beam (FIB) milling technology. A small gap ( $\sim 8$  nm) can be observed between two crossed AgNWs. Platinum may diffuse into the gap when the platinum pat was deposited onto the intersection point in the FIB cutting process.
